# Supplementary material
Source: Elsevier journal article supplement (https://www.sciencedirect.com/science/article/pii/S0301054617300897)
Supplement: mmc1 [file S0301054617300897:mmc1.doc]

**Appendix 1**

Modelos de consentimiento informado para inmunoterapia oral (ITO) con leche y clara de huevo

**A.- ITO LECHE**

**A.1.- Para padres o tutores:**

**CONSENTIMIENTO INFORMADO PARA EL TRATAMIENTO DE INMUNOTERAPIA**

**ORAL ESPECIFICA CON LECHE DE VACA**

**Nombre del paciente:**

**Número de Historia Clínica:**

**Nombre del médico que informa: Nº colegiado:**

**IDENTIFICACION Y DESCRIPCION DEL PROCEDIMIENTO:**

Su hijo/a presenta alergia a las proteínas de la leche de vaca. Este tipo de alergia es transitorio en la mayoría de los casos, alcanzando la tolerancia en los primeros años de vida. Pero en algunos casos persiste y permanece durante años con el riesgo de reacción, que puede llegar a ser grave, ante la ingestión accidental de alimentos o bebidas que contienen leche de vaca. Esta situación, obliga a estar pendiente de la composición de los alimentos que puede tomar el/la niño/a.

En la actualidad el único tratamiento recomendado para la alergia a la leche de vaca ha sido la evitación estricta de su ingesta, que en su caso presenta dificultades añadidas al ser un producto muy utilizado en la elaboración de innumerables alimentos

Existe la posibilidad de adelantar la tolerancia mediante un protocolo de tratamiento que consiste en dar pequeñas cantidades de leche de vaca que se van aumentando progresivamente hasta la cantidad igual a una toma habitual, con la ventaja de que el paciente pueda ya tolerar la leche de vaca o los alimentos que la contengan. Después de finalizar el procedimiento el paciente deberá tomar el alimento todos los días para mantener esta tolerancia.

Los incrementos de las dosis se realizaran en el Servicio/Sección/Unidad de Alergología o Alergología Pediátrica donde el paciente permanecerá vigilado y controlado por personal sanitario entrenado en el reconocimiento y manejo de las posibles reacciones adversas que puedan producirse. Estas reacciones pueden aparecer de manera inmediata o al cabo de unas horas, por lo que deberá permanecer el tiempo necesario en observación en nuestra consulta y también puede ocurrir al tomar las dosis en el domicilio por lo que el médico le informará y le dará instrucciones para su manejo y tratamiento.

Se llevará las instrucciones necesarias indicadas por su médico así como una hoja indicativa del proceso realizado por si tuviera que acudir a un Servicio de Urgencias.

**BENEFICIOS DEL PROCEDIMIENTO:**

Con esta técnica se puede conseguir que el paciente acabe tolerando sin síntomas una dosis habitual del alimento al que es alérgico pudiendo normalizar su dieta y mejorar su calidad de vida al poder realizar una vida prácticamente normal aunque en algunos casos solo se consigue tolerar una cantidad menor de alimento que le protege de la toma de pequeñas cantidades inadvertidas. Siempre va a exigir la ingesta habitual y frecuente del alimento.

**RIESGOS GENERALES Y ESPECIFICOS DEL PROCEDIMIENTO**

Esta técnica no esta exenta de riesgo ya que frecuentemente se producen reacciones alérgicas generalmente leves.

**Riesgos poco graves pero frecuentes**: enrojecimiento de la piel, urticaria (ronchas) alrededor de la boca, picor de boca, hinchazón de labios, hinchazón de párpados, dolor abdominal, vómitos aislados, tos, congestión nasal , enrojecimiento y picor ocular.

**Riesgos graves poco frecuentes**: vómitos y diarreas intensos, dificultad para respirar por hinchazón de las vías respiratorias, espasmo bronquial con tos fatiga y pitos.

En aproximadamente un 3 % de los pacientes tratados se ha observado la aparición de síntomas digestivos por inflamación del esófago (esofagitis eosinofílica) que pueden aparecer tardíamente, al cabo de semanas o meses de iniciar el tratamiento.

**Riesgos muy graves excepcionales**: disminución de la tensión arterial o shock con perdida de conocimiento, dificultad respiratoria grave.

Una vez alcanzada la dosis final, se han observado en ocasiones estos síntomas sobre todo coincidiendo con procesos infecciosos o inflamatorios, ejercicio intenso o si han trascurrido periodos superiores a 48 h sin ingerir el alimento.

**RIESGOS PERSONALIZADOS**

Además de los riesgos anteriormente reseñados, en base a su situación concreta, hay que tener en cuenta los siguientes riesgos adicionales:

**ALTERNATIVAS AL PROCEDIMIENTO**

No existe otra alternativa terapéutica para conseguir la tolerancia al alimento. La única opción de tratamiento de su alergia alimentaria es la evitación del alimento implicado.

**DECLARACIONES**

**Declaro que:**

- He comprendido la naturaleza y propósitos del tratamiento de inmunoterapia oral con leche de vaca.
- Me han sido explicados los posibles beneficios y riesgos del procedimiento mencionado.
- Estoy satisfecho de la información recibida.
- He podido formular todas las preguntas que he creído conveniente y he tenido la oportunidad de aclarar mis dudas.
- Entiendo que este consentimiento puede ser reconsiderado y revocado por mí en cualquier momento.

En consecuencia, libre y voluntariamente DOY MI CONSENTIMIENTO para que se aplique este tratamiento de inmunoterapia oral específica con leche de vaca a mi hijo/a en la Servicio/Sección /Unidad de Alergología o Alergología Pediátrica

Y para que conste, firmo el presente documento, después de haberlo leído y comprendido:

**CONSENTIMIENTO SUBROGADO**

Nombre del representante legal en caso de incapacidad del paciente para prestar consentimiento, ya sea por minoría de edad, incapacidad legal o incompetencia, con indicación del carácter con que interviene (padre, madre, tutor, etc.)

**Nombre:**

**DNI:**

**En calidad de ......................, autorizo la realización del procedimiento mencionado.**

**............a ... de ........................... de .......**

**Firma del representante legal**

**Firma del médico**

**Nombre:**

**DNI:**

**REVOCACIÓN**

**R**evoco el consentimiento anteriormente dado para la realización de la inmunoterapia oral con leche de vaca y asumo las consecuencias derivadas de ello en la evolución de la enfermedad que padece el paciente.

**......... a ... de ........................... de .......**

**Firma del representante legal**

**Nombre:**

**DNI:**

**Firma del médico**

**Nombre:**

**DNI:**

**A.2.- Para los pacientes de 12 a 17 años:**

**ASENTIMIENTO INFORMADO PARA EL TRATAMIENTO DE INMUNOTERAPIA**

**ORAL ESPECIFICA CON LECHE DE VACA (12-17 años)**

**Nombre del paciente:**

**Número de Historia Clínica:**

**Nombre del médico que informa: Nº colegiado:**

**IDENTIFICACION Y DESCRIPCION DEL PROCEDIMIENTO:**

Como sabes tienes alergia a la leche de vaca y queremos informarte acerca de un tratamiento conocido como inmunoterapia oral para intentar que puedas tomar leche con regularidad Este texto puede contener palabras, que quizás no comprendas. Por favor, pide a tu médico que te explique la información que no entiendas claramente.

Este tipo de alergia es transitorio en la mayoría de los casos, alcanzando la tolerancia en los primeros años de vida. Pero en algunos casos persiste y permanece durante años con el riesgo de reacción, que puede llegar a ser grave, ante la ingestión accidental de alimentos o bebidas que contienen leche de vaca. Esta situación, obliga a estar pendiente de la composición de los alimentos que puedes tomar.

En la actualidad el único tratamiento recomendado para la alergia a la leche de vaca ha sido la evitación estricta de su ingesta, que en tu caso presenta dificultades añadidas al ser un producto muy utilizado en la elaboración de innumerables alimentos

Existe la posibilidad de adelantar la tolerancia mediante un protocolo de tratamiento que consiste en dar pequeñas cantidades de leche de vaca que se van aumentando progresivamente hasta la cantidad igual a una toma habitual, con la ventaja de que puedas ya tolerar la leche de vaca o los alimentos que la contengan. Después de finalizar el procedimiento deberás tomar el alimento todos los días para mantener esta tolerancia.

Los incrementos de las dosis se realizaran en el Servicio/Sección/Unidad de Alergología o Alergología Pediátrica donde permanecerás vigilado/a y controlado/a por personal sanitario entrenado en el reconocimiento y manejo de las posibles reacciones adversas que puedan producirse. Estas reacciones pueden aparecer de manera inmediata o al cabo de unas horas, por lo que deberás permanecer el tiempo necesario en observación en nuestra consulta y también puede ocurrir al tomar las dosis en el domicilio por lo que el médico te informará a ti y a tus padres o tutores y os dará instrucciones para su manejo y tratamiento.

Os llevareis las instrucciones necesarias indicadas por tu médico así como una hoja indicativa del proceso realizado por si tuvieras que acudir a un Servicio de Urgencias.

**BENEFICIOS DEL PROCEDIMIENTO:**

Con esta técnica se puede conseguir que acabes tolerando sin síntomas una dosis habitual del alimento al que eres alérgico pudiendo normalizar tu dieta y mejorar tu calidad de vida al poder realizar una vida prácticamente normal aunque en algunos casos solo se consigue tolerar una cantidad menor de alimento que te protegería de la toma de pequeñas cantidades inadvertidas. Siempre va a exigir la ingesta habitual y frecuente del alimento.

.

**RIESGOS GENERALES Y ESPECIFICOS DEL PROCEDIMIENTO**

Esta técnica no esta exenta de riesgo ya que frecuentemente se producen reacciones alérgicas generalmente leves.

**Riesgos poco graves pero frecuentes**: enrojecimiento de la piel, urticaria (ronchas) alrededor de la boca, picor de boca, hinchazón de labios, hinchazón de párpados, dolor abdominal, vómitos aislados, tos, congestión nasal , enrojecimiento y picor ocular.

**Riesgos graves poco frecuentes**: vómitos y diarreas intensos, dificultad para respirar por hinchazón de las vías respiratorias, espasmo bronquial con tos fatiga y pitos.

En aproximadamente 3 de cada 100 pacientes tratados se ha observado la aparición de síntomas digestivos por inflamación del esófago (esofagitis eosinofílica) que pueden aparecer tardíamente, al cabo de semanas o meses de iniciar el tratamiento.

**Riesgos muy graves excepcionales**: disminución de la tensión arterial o shock con pérdida de conocimiento, dificultad respiratoria grave.

Una vez alcanzada la dosis final, se han observado en ocasiones estos síntomas sobre todo coincidiendo con procesos infecciosos o inflamatorios, ejercicio intenso o si han trascurrido periodos superiores a 48 h sin ingerir el alimento.

**RIESGOS PERSONALIZADOS**

Además de los riesgos anteriormente reseñados, en base a su situación concreta, hay que tener en cuenta los siguientes riesgos adicionales:

**ALTERNATIVAS AL PROCEDIMIENTO**

No existe otra alternativa terapéutica para conseguir la tolerancia al alimento. La única opción de tratamiento de tu alergia alimentaria es la evitación del alimento implicado.

**DECLARACIONES**

**Declaro que:**

- He comprendido la naturaleza y propósitos del tratamiento de inmunoterapia oral con leche de vaca.
- Me han sido explicados los posibles beneficios y riesgos del procedimiento mencionado.
- Estoy satisfecho de la información recibida.
- He podido formular todas las preguntas que he creído conveniente y he tenido la oportunidad de aclarar mis dudas.
- Entiendo que este consentimiento puede ser reconsiderado y revocado por mí en cualquier momento.

En consecuencia, libre y voluntariamente DOY MI ASENTIMIENTO para que se me aplique este tratamiento de inmunoterapia oral específica con leche de vaca en el Servicio/Sección /Unidad de Alergología o Alergología Pediátrica

Y para que conste, firmo el presente documento, después de haberlo leído y comprendido:

**Nombre del paciente:**

**DNI:**

**Firma del paciente**

**Firma del médico**

**Nombre:**

**DNI:**

**REVOCACIÓN**

**R**evoco el consentimiento anteriormente dado para la realización de la inmunoterapia oral con leche de vaca y asumo las consecuencias derivadas de ello en la evolución de la enfermedad que padezco.

**......... a ... de ........................... de .......**

**Nombre del paciente:**

**DNI:**

**Firma del paciente**

**Firma del médico**

**Nombre:**

**DNI:**

**A.3.- Para los pacientes adultos o mayores de 17 años:**

**CONSENTIMIENTO INFORMADO PARA EL TRATAMIENTO DE INMUNOTERAPIA**

**ORAL ESPECIFICA CON LECHE DE VACA**

**Nombre del paciente:**

**Número de Historia Clínica:**

**Nombre del médico que informa: Nº colegiado:**

**IDENTIFICACION Y DESCRIPCION DEL PROCEDIMIENTO:**

Usted presenta alergia a las proteínas de la leche de vaca. Este tipo de alergia es transitorio en la mayoría de los casos, alcanzando la tolerancia en los primeros años de vida. Pero en algunos casos persiste y permanece durante años con el riesgo de reacción, que puede llegar a ser grave, ante la ingestión accidental de alimentos o bebidas que contienen leche de vaca. Esta situación, obliga a estar pendiente de la composición de los alimentos que puede tomar.

En la actualidad el único tratamiento recomendado para la alergia a la leche de vaca ha sido la evitación estricta de su ingesta, que en su caso presenta dificultades añadidas al ser un producto muy utilizado en la elaboración de innumerables alimentos

Existe la posibilidad de adelantar la tolerancia mediante un protocolo de tratamiento que consiste en dar pequeñas cantidades de leche de vaca que se van aumentando progresivamente hasta la cantidad igual a una toma habitual, con la ventaja de que el paciente pueda ya tolerar la leche de vaca o los alimentos que la contengan. Después de finalizar el procedimiento el paciente deberá tomar el alimento todos los días para mantener esta tolerancia.

Los incrementos de las dosis se realizaran en el Servicio/Sección/Unidad de Alergología o Alergología Pediátrica donde el paciente permanecerá vigilado y controlado por personal sanitario entrenado en el reconocimiento y manejo de las posibles reacciones adversas que puedan producirse. Estas reacciones pueden aparecer de manera inmediata o al cabo de unas horas, por lo que deberá permanecer el tiempo necesario en observación en nuestra consulta y también puede ocurrir al tomar las dosis en el domicilio por lo que el médico le informará y le dará instrucciones para su manejo y tratamiento.

Se llevará las instrucciones necesarias indicadas por su médico así como una hoja indicativa del proceso realizado por si tuviera que acudir a un Servicio de Urgencias.

**BENEFICIOS DEL PROCEDIMIENTO:**

Con esta técnica se puede conseguir que el paciente acabe tolerando sin síntomas una dosis habitual del alimento al que es alérgico pudiendo normalizar su dieta y mejorar su calidad de vida al poder realizar una vida prácticamente normal aunque en algunos casos solo se consigue tolerar una cantidad menor de alimento que le protege de la toma de pequeñas cantidades inadvertidas. Siempre va a exigir la ingesta habitual y frecuente del alimento.

**RIESGOS GENERALES Y ESPECIFICOS DEL PROCEDIMIENTO**

Esta técnica no esta exenta de riesgo ya que frecuentemente se producen reacciones alérgicas generalmente leves.

**Riesgos poco graves pero frecuentes**: enrojecimiento de la piel, urticaria (ronchas) alrededor de la boca, picor de boca, hinchazón de labios, hinchazón de párpados, dolor abdominal, vómitos aislados, tos, congestión nasal , enrojecimiento y picor ocular.

**Riesgos graves poco frecuentes**: vómitos y diarreas intensos, dificultad para respirar por hinchazón de las vías respiratorias, espasmo bronquial con tos fatiga y pitos.

En aproximadamente un 3 % de los pacientes tratados se ha observado la aparición de síntomas digestivos por inflamación del esófago (esofagitis eosinofílica) que pueden aparecer tardíamente, al cabo de semanas o meses de iniciar el tratamiento.

**Riesgos muy graves excepcionales**: disminución de la tensión arterial o shock con perdida de conocimiento, dificultad respiratoria grave.

Una vez alcanzada la dosis final, se han observado en ocasiones estos síntomas sobre todo coincidiendo con procesos infecciosos o inflamatorios, ejercicio intenso o si han trascurrido periodos superiores a 48 h sin ingerir el alimento.

**RIESGOS PERSONALIZADOS**

Además de los riesgos anteriormente reseñados, en base a su situación concreta, hay que tener en cuenta los siguientes riesgos adicionales:

**ALTERNATIVAS AL PROCEDIMIENTO**

No existe otra alternativa terapéutica para conseguir la tolerancia al alimento. La única opción de tratamiento de su alergia alimentaria es la evitación del alimento implicado.

**DECLARACIONES**

**Declaro que:**

- He comprendido la naturaleza y propósitos del tratamiento de inmunoterapia oral con leche de vaca.
- Me han sido explicados los posibles beneficios y riesgos del procedimiento mencionado.
- Estoy satisfecho de la información recibida.
- He podido formular todas las preguntas que he creído conveniente y he tenido la oportunidad de aclarar mis dudas.
- Entiendo que este consentimiento puede ser reconsiderado y revocado por mí en cualquier momento.

En consecuencia, libre y voluntariamente DOY MI CONSENTIMIENTO para que se me aplique este tratamiento de inmunoterapia oral específica con leche de vaca en la Servicio/Sección /Unidad de Alergología o Alergología Pediátrica

Y para que conste, firmo el presente documento, después de haberlo leído y comprendido:

**Nombre del paciente:**

**DNI:**

**Firma del paciente**

**Firma del médico**

**Nombre:**

**DNI:**

**REVOCACIÓN**

**R**evoco el consentimiento anteriormente dado para la realización de la inmunoterapia oral con leche de vaca y asumo las consecuencias derivadas de ello en la evolución de la enfermedad que padezco.

**......... a ... de ........................... de .......**

**Nombre del paciente:**

**DNI:**

**Firma del paciente**

**Firma del médico**

**Nombre:**

**DNI:**

**B.- ITO HUEVO**

**B.1.- Para padres o tutores:**

**CONSENTIMIENTO INFORMADO PARA EL TRATAMIENTO DE INMUNOTERAPIA**

**ORAL ESPECIFICA CON CLARA DE HUEVO**

**Nombre del paciente:**

**Número de Historia Clínica:**

**Nombre del médico que informa: Nº colegiado:**

**IDENTIFICACION Y DESCRIPCION DEL PROCEDIMIENTO:**

Su hijo/a presenta alergia a las proteínas del huevo. Este tipo de alergia es transitorio en la mayoría de los casos, alcanzando la tolerancia en los primeros años de vida. Pero en algunos casos persiste y permanece durante años con el riesgo de reacción, que puede llegar a ser grave, ante la ingestión accidental de alimentos o bebidas que contienen huevo. Esta situación, obliga a estar pendiente de la composición de los alimentos que puede tomar el/la niño/a.

En la actualidad el único tratamiento recomendado para la alergia al huevo ha sido la evitación estricta de su ingesta, que en su caso presenta dificultades añadidas al ser un producto muy utilizado en la elaboración de innumerables alimentos

Existe la posibilidad de adelantar la tolerancia mediante un protocolo de tratamiento que consiste en dar pequeñas cantidades de clara de huevo que se van aumentando progresivamente hasta la cantidad igual a una toma habitual, con la ventaja de que el paciente pueda ya tolerar el huevo o los alimentos que lo contengan. Después de finalizar el procedimiento el paciente deberá tomar al menos un huevo 2-3 días a la semana para mantener esta tolerancia.

Los incrementos de las dosis se realizarán en el Servicio/Sección/Unidad de Alergología o Alergología Pediátrica donde el paciente permanecerá vigilado y controlado por personal sanitario entrenado en el reconocimiento y manejo de las posibles reacciones adversas que puedan producirse. Estas reacciones pueden aparecer de manera inmediata o al cabo de unas horas, por lo que deberá permanecer el tiempo necesario en observación en nuestra consulta y también puede ocurrir al tomar las dosis en el domicilio por lo que el médico le informará y le dará instrucciones para su manejo y tratamiento.

Se llevará las instrucciones necesarias indicadas por su médico así como una hoja indicativa del proceso realizado por si tuviera que acudir a un Servicio de Urgencias.

**BENEFICIOS DEL PROCEDIMIENTO:**

Con esta técnica se puede conseguir que el paciente acabe tolerando sin síntomas una dosis habitual del alimento al que es alérgico pudiendo normalizar su dieta y mejorar su calidad de vida al poder realizar una vida prácticamente normal aunque en algunos casos solo se consigue tolerar una cantidad menor de alimento que le protege de la toma de pequeñas cantidades inadvertidas. Siempre va a exigir la ingesta habitual y frecuente del alimento.

**RIESGOS GENERALES Y ESPECIFICOS DEL PROCEDIMIENTO**

Esta técnica no esta exenta de riesgo ya que frecuentemente se producen reacciones alérgicas generalmente leves.

**Riesgos poco graves pero frecuentes**: enrojecimiento de la piel, urticaria (ronchas) alrededor de la boca, picor de boca, hinchazón de labios, hinchazón de párpados, dolor abdominal, vómitos aislados, tos, congestión nasal , enrojecimiento y picor ocular.

**Riesgos graves poco frecuentes**: vómitos y diarreas intensos, dificultad para respirar por hinchazón de las vías respiratorias, espasmo bronquial con tos fatiga y pitos.

En aproximadamente un 3 % de los pacientes tratados se ha observado la aparición de síntomas digestivos por inflamación del esófago (esofagitis eosinofílica) que pueden aparecer tardíamente, al cabo de semanas o meses de iniciar el tratamiento.

**Riesgos muy graves excepcionales**: disminución de la tensión arterial o shock con perdida de conocimiento, dificultad respiratoria grave.

Una vez alcanzada la dosis final, se han observado en ocasiones estos síntomas sobre todo coincidiendo con procesos infecciosos o inflamatorios, ejercicio intenso o si han trascurrido periodos superiores a 48 h sin ingerir el alimento.

**RIESGOS PERSONALIZADOS**

Además de los riesgos anteriormente reseñados, en base a su situación concreta, hay que tener en cuenta los siguientes riesgos adicionales:

**ALTERNATIVAS AL PROCEDIMIENTO**

No existe otra alternativa terapéutica para conseguir la tolerancia al alimento. La única opción de tratamiento de su alergia alimentaria es la evitación del alimento implicado.

**DECLARACIONES**

**Declaro que:**

- He comprendido la naturaleza y propósitos del tratamiento de inmunoterapia oral con clara de huevo .
- Me han sido explicados los posibles beneficios y riesgos del procedimiento mencionado.
- Estoy satisfecho de la información recibida.
- He podido formular todas las preguntas que he creído conveniente y he tenido la oportunidad de aclarar mis dudas.
- Entiendo que este consentimiento puede ser reconsiderado y revocado por mí en cualquier momento.

En consecuencia, libre y voluntariamente DOY MI CONSENTIMIENTO para que se aplique este tratamiento de inmunoterapia oral específica con clara de huevo a mi hijo/a en la Servicio/Sección/Unidad de Alergología o Alergología Pediátrica

Y para que conste, firmo el presente documento, después de haberlo leído y comprendido:

**CONSENTIMIENTO SUBROGADO**

Nombre del representante legal en caso de incapacidad del paciente para prestar consentimiento, ya sea por minoría de edad, incapacidad legal o incompetencia, con indicación del carácter con que interviene (padre, madre, tutor, etc.)

**Nombre:**

**DNI:**

**En calidad de ......................, autorizo la realización del procedimiento mencionado.**

**............a ... de ........................... de .......**

**Firma del representante legal**

**Firma del médico**

**Nombre:**

**DNI:**

**REVOCACIÓN**

**R**evoco el consentimiento anteriormente dado para la realización de la inmunoterapia oral con clara de huevo y asumo las consecuencias derivadas de ello en la evolución de la enfermedad que padece el paciente.

**......... a ... de ........................... de .......**

**Firma del representante legal**

**Nombre:**

**DNI:**

**Firma del médico**

**Nombre:**

**DNI:**

**B.2.- Para los pacientes de 12 a 17 años:**

**ASENTIMIENTO INFORMADO PARA EL TRATAMIENTO DE INMUNOTERAPIA**

**ORAL ESPECIFICA CON CLARA DE HUEVO (12-17 años)**

**Nombre del paciente:**

**Número de Historia Clínica:**

**Nombre del médico que informa: Nº colegiado:**

**IDENTIFICACION Y DESCRIPCION DEL PROCEDIMIENTO:**

Como sabes tienes alergia al huevo y queremos informarte acerca de un tratamiento conocido como inmunoterapia oral para intentar que puedas tomar huevo con regularidad Este texto puede contener palabras, que quizás no comprendas. Por favor, pide a tu médico que te explique la información que no entiendas claramente.

Este tipo de alergia es transitorio en la mayoría de los casos, alcanzando la tolerancia en los primeros años de vida. Pero en algunos casos persiste y permanece durante años con el riesgo de reacción, que puede llegar a ser grave, ante la ingestión accidental de alimentos o bebidas que contienen huevo. Esta situación, obliga a estar pendiente de la composición de los alimentos que puede tomar.

En la actualidad el único tratamiento recomendado para la alergia al huevo ha sido la evitación estricta de su ingesta, que en tu caso presenta dificultades añadidas al ser un producto muy utilizado en la elaboración de innumerables alimentos

Existe la posibilidad de adelantar la tolerancia mediante un protocolo de tratamiento que consiste en dar pequeñas cantidades de clara de huevo que se van aumentando progresivamente hasta la cantidad igual a una toma habitual, con la ventaja de que puedas ya tolerar el huevo o los alimentos que lo contengan. Después de finalizar el procedimiento deberás tomar al menos un huevo 2-3 días a la semana para mantener esta tolerancia.

Los incrementos de las dosis se realizaran en el Servicio/Sección /Unidad de Alergología o Alergología Pediátrica donde permanecerás vigilado/a y controlado/a por personal sanitario entrenado en el reconocimiento y manejo de las posibles reacciones adversas que puedan producirse. Estas reacciones pueden aparecer de manera inmediata o al cabo de unas horas, por lo que deberás permanecer el tiempo necesario en observación en nuestra consulta y también puede ocurrir al tomar las dosis en el domicilio por lo que el médico te informará a ti y a tus padres o tutores y os dará instrucciones para su manejo y tratamiento.

Os llevareis las instrucciones necesarias indicadas por tu médico así como una hoja indicativa del proceso realizado por si tuvieras que acudir a un Servicio de Urgencias.

**BENEFICIOS DEL PROCEDIMIENTO:**

Con esta técnica se puede conseguir que acabes tolerando sin síntomas una dosis habitual del alimento al que eres alérgico pudiendo normalizar tu dieta y mejorar tu calidad de vida al poder realizar una vida prácticamente normal aunque en algunos casos solo se consigue tolerar una cantidad menor de alimento que te protegería de la toma de pequeñas cantidades inadvertidas. Siempre va a exigir la ingesta habitual y frecuente del alimento

**RIESGOS GENERALES Y ESPECIFICOS DEL PROCEDIMIENTO**

Esta técnica no esta exenta de riesgo ya que frecuentemente se producen reacciones alérgicas generalmente leves.

**Riesgos poco graves pero frecuentes**: enrojecimiento de la piel, urticaria (ronchas) alrededor de la boca, picor de boca, hinchazón de labios, hinchazón de párpados, dolor abdominal, vómitos aislados, tos, congestión nasal , enrojecimiento y picor ocular.

**Riesgos graves poco frecuentes**: vómitos y diarreas intensos, dificultad para respirar por hinchazón de las vías respiratorias, espasmo bronquial con tos fatiga y pitos.

En aproximadamente 3 de cada 100 pacientes tratados se ha observado la aparición de síntomas digestivos por inflamación del esófago (esofagitis eosinofílica) que pueden aparecer tardíamente, al cabo de semanas o meses de iniciar el tratamiento.

**Riesgos muy graves excepcionales**: disminución de la tensión arterial o shock con pérdida de conocimiento, dificultad respiratoria grave.

Una vez alcanzada la dosis final, se han observado en ocasiones estos síntomas sobre todo coincidiendo con procesos infecciosos o inflamatorios, ejercicio intenso o si han trascurrido periodos superiores a 48 h sin ingerir el alimento.

**RIESGOS PERSONALIZADOS**

Además de los riesgos anteriormente reseñados, en base a su situación concreta, hay que tener en cuenta los siguientes riesgos adicionales:

**ALTERNATIVAS AL PROCEDIMIENTO**

No existe otra alternativa terapéutica para conseguir la tolerancia al alimento. La única opción de tratamiento de su alergia alimentaria es la evitación del alimento implicado.

**DECLARACIONES**

**Declaro que:**

- He comprendido la naturaleza y propósitos del tratamiento de inmunoterapia oral con clara de huevo
- Me han sido explicados los posibles beneficios y riesgos del procedimiento mencionado.
- Estoy satisfecho de la información recibida.
- He podido formular todas las preguntas que he creído conveniente y he tenido la oportunidad de aclarar mis dudas.
- Entiendo que este consentimiento puede ser reconsiderado y revocado por mí en cualquier momento.

En consecuencia, libre y voluntariamente DOY MI ASENTIMIENTO para que se me aplique este tratamiento de inmunoterapia oral específica con clara de huevo en la Servicio/Sección/Unidad de Alergología o Alergología Pediátrica

Y para que conste, firmo el presente documento, después de haberlo leído y comprendido:

**Nombre del paciente:**

**DNI:**

**Firma del paciente**

**Firma del médico**

**Nombre:**

**DNI:**

**REVOCACIÓN**

**R**evoco el consentimiento anteriormente dado para la realización de la inmunoterapia oral con clara de huevo y asumo las consecuencias derivadas de ello en la evolución de la enfermedad que padezco.

**......... a ... de ........................... de .......**

**Nombre del paciente:**

**DNI:**

**Firma del paciente**

**Firma del médico**

**Nombre:**

**DNI:**

**B.3.- Para los pacientes adultos o mayores de 17 años:**

**CONSENTIMIENTO INFORMADO PARA EL TRATAMIENTO DE INMUNOTERAPIA**

**ORAL ESPECIFICA CON CLARA DE HUEVO**

**Nombre del paciente:**

**Número de Historia Clínica:**

**Nombre del médico que informa: Nº colegiado:**

**IDENTIFICACION Y DESCRIPCION DEL PROCEDIMIENTO:**

Usted presenta alergia a las proteínas del huevo. Este tipo de alergia es transitorio en la mayoría de los casos, alcanzando la tolerancia en los primeros años de vida. Pero en algunos casos persiste y permanece durante años con el riesgo de reacción, que puede llegar a ser grave, ante la ingestión accidental de alimentos o bebidas que contienen huevo. Esta situación, obliga a estar pendiente de la composición de los alimentos que puede tomar.

En la actualidad el único tratamiento recomendado para la alergia al huevo ha sido la evitación estricta de su ingesta, que en su caso presenta dificultades añadidas al ser un producto muy utilizado en la elaboración de innumerables alimentos

Existe la posibilidad de adelantar la tolerancia mediante un protocolo de tratamiento que consiste en dar pequeñas cantidades de clara de huevo que se van aumentando progresivamente hasta la cantidad igual a una toma habitual, con la ventaja de que el paciente pueda ya tolerar el huevo o los alimentos que lo contengan. Después de finalizar el procedimiento el paciente deberá tomar al menos un huevo 2-3 días a la semana para mantener esta tolerancia.

Los incrementos de las dosis se realizaran en el Servicio/Sección/Unidad de Alergología o Alergología Pediátrica donde el paciente permanecerá vigilado y controlado por personal sanitario entrenado en el reconocimiento y manejo de las posibles reacciones adversas que puedan producirse. Estas reacciones pueden aparecer de manera inmediata o al cabo de unas horas, por lo que deberá permanecer el tiempo necesario en observación en nuestra consulta y también puede ocurrir al tomar las dosis en el domicilio por lo que el médico le informará y le dará instrucciones para su manejo y tratamiento.

Se llevará las instrucciones necesarias indicadas por su médico así como una hoja indicativa del proceso realizado por si tuviera que acudir a un Servicio de Urgencias.

**BENEFICIOS DEL PROCEDIMIENTO:**

Con esta técnica se puede conseguir que el paciente acabe tolerando sin síntomas una dosis habitual del alimento al que es alérgico pudiendo normalizar su dieta y mejorar su calidad de vida al poder realizar una vida prácticamente normal aunque en algunos casos solo se consigue tolerar una cantidad menor de alimento que le protege de la toma de pequeñas cantidades inadvertidas. Siempre va a exigir la ingesta habitual y frecuente del alimento.

**RIESGOS GENERALES Y ESPECIFICOS DEL PROCEDIMIENTO**

Esta técnica no esta exenta de riesgo ya que frecuentemente se producen reacciones alérgicas generalmente leves.

**Riesgos poco graves pero frecuentes**: enrojecimiento de la piel, urticaria (ronchas) alrededor de la boca, picor de boca, hinchazón de labios, hinchazón de párpados, dolor abdominal, vómitos aislados, tos, congestión nasal , enrojecimiento y picor ocular.

**Riesgos graves poco frecuentes**: vómitos y diarreas intensos, dificultad para respirar por hinchazón de las vías respiratorias, espasmo bronquial con tos fatiga y pitos.

En aproximadamente un 3 % de los pacientes tratados se ha observado la aparición de síntomas digestivos por inflamación del esófago (esofagitis eosinofílica) que pueden aparecer tardíamente, al cabo de semanas o meses de iniciar el tratamiento.

**Riesgos muy graves excepcionales**: disminución de la tensión arterial o shock con perdida de conocimiento, dificultad respiratoria grave.

Una vez alcanzada la dosis final, se han observado en ocasiones estos síntomas sobre todo coincidiendo con procesos infecciosos o inflamatorios, ejercicio intenso o si han trascurrido periodos superiores a 48 h sin ingerir el alimento.

**RIESGOS PERSONALIZADOS**

Además de los riesgos anteriormente reseñados, en base a su situación concreta, hay que tener en cuenta los siguientes riesgos adicionales:

**ALTERNATIVAS AL PROCEDIMIENTO**

No existe otra alternativa terapéutica para conseguir la tolerancia al alimento. La única opción de tratamiento de su alergia alimentaria es la evitación del alimento implicado.

**DECLARACIONES**

**Declaro que:**

- He comprendido la naturaleza y propósitos del tratamiento de inmunoterapia oral con clara de huevo
- Me han sido explicados los posibles beneficios y riesgos del procedimiento mencionado.
- Estoy satisfecho de la información recibida.
- He podido formular todas las preguntas que he creído conveniente y he tenido la oportunidad de aclarar mis dudas.
- Entiendo que este consentimiento puede ser reconsiderado y revocado por mí en cualquier momento.

En consecuencia, libre y voluntariamente DOY MI CONSENTIMIENTO para que se me aplique este tratamiento de inmunoterapia oral específica con clara de huevo en la Servicio/Sección/Unidad de Alergología o Alergología Pediátrica

Y para que conste, firmo el presente documento, después de haberlo leído y comprendido:

**Nombre del paciente:**

**DNI:**

**Firma del paciente**

**Firma del médico**

**Nombre:**

**DNI:**

**REVOCACIÓN**

**R**evoco el consentimiento anteriormente dado para la realización de la inmunoterapia oral con clara de huevo y asumo las consecuencias derivadas de ello en la evolución de la enfermedad que padezco.

**......... a ... de ........................... de .......**

**Nombre del paciente:**

**DNI:**

**Firma del paciente**

**Firma del médico**

**Nombre:**

**DNI:**
