# Supplementary material
Source: Elsevier journal article supplement (https://www.sciencedirect.com/science/article/pii/S0301054617300897)
Supplement: mmc2 [file S0301054617300897:mmc2.doc]

**Table II. Protein contents of dairy products.**

| **DAIRY PRODUCTS FROM COW’S MILK** | **PROTEINS per 100 g or 100 ml** | **COMMON PRESENTATIONS MARKETED IN SPAIN** |
| --- | --- | --- |
| **IN PRACTICE ONE CONCRETE BRAND AND TYPE SHOULD BE USED** | | |
| **Cow’s milk**  **Skimmed milk**  **Calcium-enriched milk**  **Skimmed milk with calcium** | **2.9 to 3.1 g**  **Up to 3.4 g**  **Up to 4.3 g**  **Up to 4.8 g** | **One-liter container**  **200 ml = 5.8-6.2 g proteins/6.8 g** |
| **Liquid yogurt (e.g., Actimel)** | **2.9 to 3.2 g in skimmed product** | **94 ml container**  **Also one-liter container** |
| **Yogurt**  **Greek yogurt**  **Skimmed yogurt**  **Skimmed Greek yogurt** | **3 to 3.9 g**  **3.7 to 4.1 g**  **Up to 5.7 g with fruit**  **Up to 7-8 g in skimmed product** | **Usual container 125 g**  **115 g and 1 kg container** |
| **Cheese in portions** | **11 to 15.6 g** | **One portion approximately 16-18 g = 2.5 g** |
| **Cheese in slices** | **19 to 25 g** | **One slice approximately 3.7 g** |
| **Fresh cheese (e.g., Philadelphia)**  **Others** | **4.5 g**  **Up to 7 g** | **Cream in 180 g container and half container = 4 g** |
| **Mini-portions type cheese (e.g., Baby bel)** | **25 g** | **20 g pieces with 5 g per unit** |
| **Burgos type cheese (e.g., Arias)**  **Other Burgos cheeses** | **10.5 g**  **7 to 15 g** | **Container 240 g = 26 g** |
| **Ricotta-type cheese** | **13.6 g** |  |
| **Liquid cream**  **Whipped cream** | **Not specified**  **2.3 to 2.5 g** |  |
| **Gruyere** | **8 g** |  |
| **Brie** | **18.9 g** |  |
| **Gallego de tetilla cheese** | **22 g** |  |
| **Parmesan** | **38 g** |  |
| **ARTISANAL CHEESES DO NOT ALWAYS STATE THE PROTEIN CONTENTS. THE AMOUNT OF PROTEINS VARIES WITH THE PRODUCT TYPE, FLAVOR AND BRAND** | | |
| **DAIRY PRODUCTS FROM OTHER RUMINANTS** | | |
| **Goat milk** | **3.5 to 3.9 g** | **One-liter container (several brands)** |
| **Sheep milk** | **5.2 to 5.4 g** | **One-liter container (currently only one brand)** |
| **Fresh Manchego type cheese (sheep or mixed)** | **Up to 25 g** |  |
| **Cured Manchego-type cheese (sheep)** | **32 g** | **Depends on curing degree** |
| **Fresh goat cheese** | **Up to 10.5 g** |  |
| **Cured goat cheese** | **27.6 g** | **Depends on curing degree** |

E. Alonso-Lebrero (developed from data available in 2015)
